# Supplementary material
Source: PubMed Central journal article supplement (PMC5035158)
Supplement: supp_WNL.0000000000003034_Figure_e-1.pdf [file supp_WNL.0000000000003034_Figure_e-1.pdf]

(A)

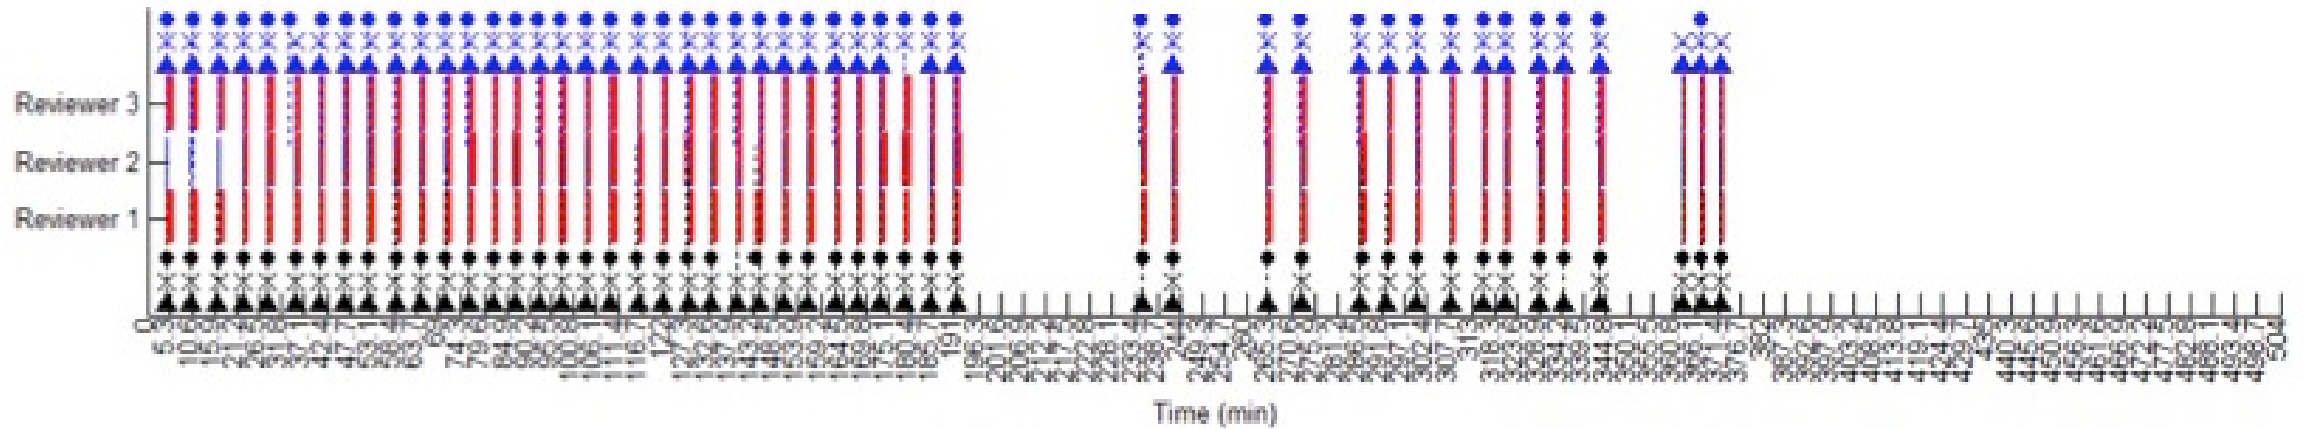

(B)

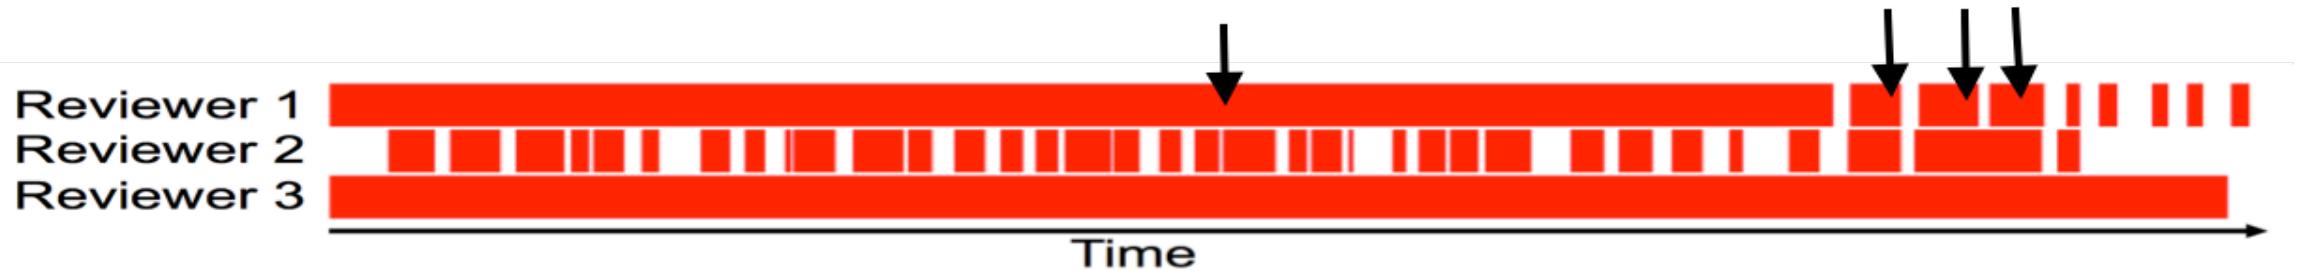

SUPPLEMENTARY FIGURE e-1. Determination of gold standard seizures: The red bars depict seizure onset and offset as marked by raw EEG reviewers (marked Reviewer 1, 2 and 3). For a given seizure, an overlap of >50% of seizure duration between at least 2 reviewers was required to have it count as a “gold standard” seizure. (A) In this epoch, frequent brief seizures are seen; the first three seizures have 2/3 agreement between the three raw reviewers while all other seizures appear to have 3/3 consensus. The blue dots, crosses and triangles denote events marked by QEEG-only reviewer 1,2,3 while the black dot crosses and triangles denote seizures marked by the QEEG+raw reviewers 1,2 and 3. This record showed higher sensitivity for both Q and QR groups (97%) (B) In this epoch, frequent brief seizures marked by reviewer 2 were marked as fewer more prolonged seizures by reviewers 1 and 3. This epoch contained 4 gold standard seizures.
